# Supplementary material
Source: Research Square preprint supplement (doi:10.21203/rs.3.rs-9636843/v1)
Supplement: Supplementary file 1 [file 649a25e16cca3c71114ef31e.pdf]

# 1 An MRI Foundation Model for Versatile Clinical 2 Applications in Gynecological Cancer via Report 3 Metadata Learning

4 Shenghua Cheng<sup>1,16,17,+</sup>, Hongtao Kang<sup>1,+</sup>, Yu Wang<sup>2,+</sup>, Wenjun Zheng<sup>1,+</sup>, Haoqiang He<sup>3</sup>,  
5 Peiqi Zhuang<sup>1</sup>, Abuduxukuer Aili<sup>2</sup>, Lu Yang<sup>2</sup>, Longfeng Yang<sup>2</sup>, Gengxi Cai<sup>4</sup>, Liejing Lu<sup>5</sup>,  
6 Shuqi Jiang<sup>6</sup>, Jiayi Zhuo<sup>7</sup>, Yujian Zou<sup>8</sup>, Jianpeng Li<sup>8</sup>, Zhuangyong Xu<sup>9</sup>, Ya Zhang<sup>10</sup>,  
7 Renbing Zhou<sup>11</sup>, Xi Zhong<sup>12</sup>, Yu Tan<sup>13</sup>, Xian Liu<sup>14</sup>, Hui Mai<sup>15</sup>, Lan Zhang<sup>1,\*</sup>, Xiaohua Ban<sup>3,\*</sup>,  
8 Jun Shen<sup>2,18,\*</sup>, and Xiaohui Duan<sup>2,18,\*</sup>

9 <sup>1</sup>School of Biomedical Engineering, Southern Medical University, Guangzhou, 510515, China.

10 <sup>2</sup>Department of Radiology, Sun Yat-sen Memorial Hospital, Sun Yat-sen University, No. 107 Yanjiang Road West,  
11 Guangzhou 510120, Guangdong, China.

12 <sup>3</sup>Department of Radiology, State Key Laboratory of Oncology in South China, Collaborative Innovation Center for  
13 Cancer Medicine, Sun Yat-Sen University Cancer Center, 651 Dongfeng Road East, Guangzhou, Guangdong  
14 510060, China.

15 <sup>4</sup>Department of Breast Surgery, The First People's Hospital of Foshan. Foshan 528000, China.

16 <sup>5</sup>Department of Radiology, The First People's Hospital of Foshan, Foshan 528000, China.

17 <sup>6</sup>Department of Radiology, The First Affiliated Hospital Guangzhou University of Chinese Medicine, Guangzhou  
18 510405, Guangdong, China.

19 <sup>7</sup>Department of Radiology, Shenshan Medical Center, Sun Yat-sen Memorial Hospital, Sun Yat-sen University,  
20 Shanwei 516621, Guangdong, China.

21 <sup>8</sup>Department of Radiology, Affiliated Dongguan People's Hospital, Southern Medical University, Dongguan,  
22 Guangdong, People's Republic of China.

23 <sup>9</sup>Department of Radiology, Shantou Central Hospital, No. 114 Waima Road, Shantou 515031, China.

24 <sup>10</sup>Department of Radiology, The Third Affiliated Hospital of Kunming Medical University, Yunnan Cancer Hospital,  
25 No. 519 Kunzhou Road, Xishan District, Kunming 650118, Yunnan, China.

26 <sup>11</sup>Medical Imaging Center, The First People's Hospital of Kashi, 120 Yingbin Avenue, Kashi City, 844000, Xinjiang,  
27 China. <sup>12</sup>Department of Medical Imaging, Guangzhou Institute of Cancer Research, The Affiliated Cancer  
28 Hospital, Guangzhou Medical University, Guangzhou, China.

29 <sup>12</sup>Department of Medical Imaging, Guangzhou Institute of Cancer Research, The Affiliated Cancer Hospital,  
30 Guangzhou Medical University, Guangzhou, China.

31 <sup>13</sup>Department of Radiology, Guangdong Women and Children Hospital, Guangzhou, China.

32 <sup>14</sup>Department of Radiology, The Second Affiliated Hospital of Guangzhou University of Chinese Medicine,  
33 Guangzhou, Guangdong, China.

34 <sup>15</sup>Department of Radiology, Guangdong Provincial Key Laboratory of Major Obstetric Diseases, Guangdong  
35 Provincial Clinical Research Center for Obstetrics and Gynecology, The Third Affiliated Hospital, Guangzhou  
36 Medical University, Guangzhou, China.

37 <sup>16</sup>Guangdong Provincial Key Laboratory of Medical Image Processing, Southern Medical University, Guangzhou,  
38 510515, China.

39 <sup>17</sup>Guangdong Province Engineering Laboratory for Medical Imaging and Diagnostic Technology, Southern Medical  
40 University Guangzhou, 510515, China.

41 <sup>18</sup>Guangdong Provincial Key Laboratory of Malignant Tumor Epigenetics and Gene Regulation, Medical Research  
42 Center, Sun Yat-sen Memorial Hospital, Sun Yat-sen University, Guangzhou 510120, Guangdong, China.

43 \*Corresponding authors: zhang\_lan98@163.com (L. Zhang), banxh@sysucc.org.cn (X. Ban),  
44 shenjun@mail.sysu.edu.cn (J. Shen), duanxh5@mail.sysu.edu.cn (X. Duan).

45 +These authors contributed equally to this work.

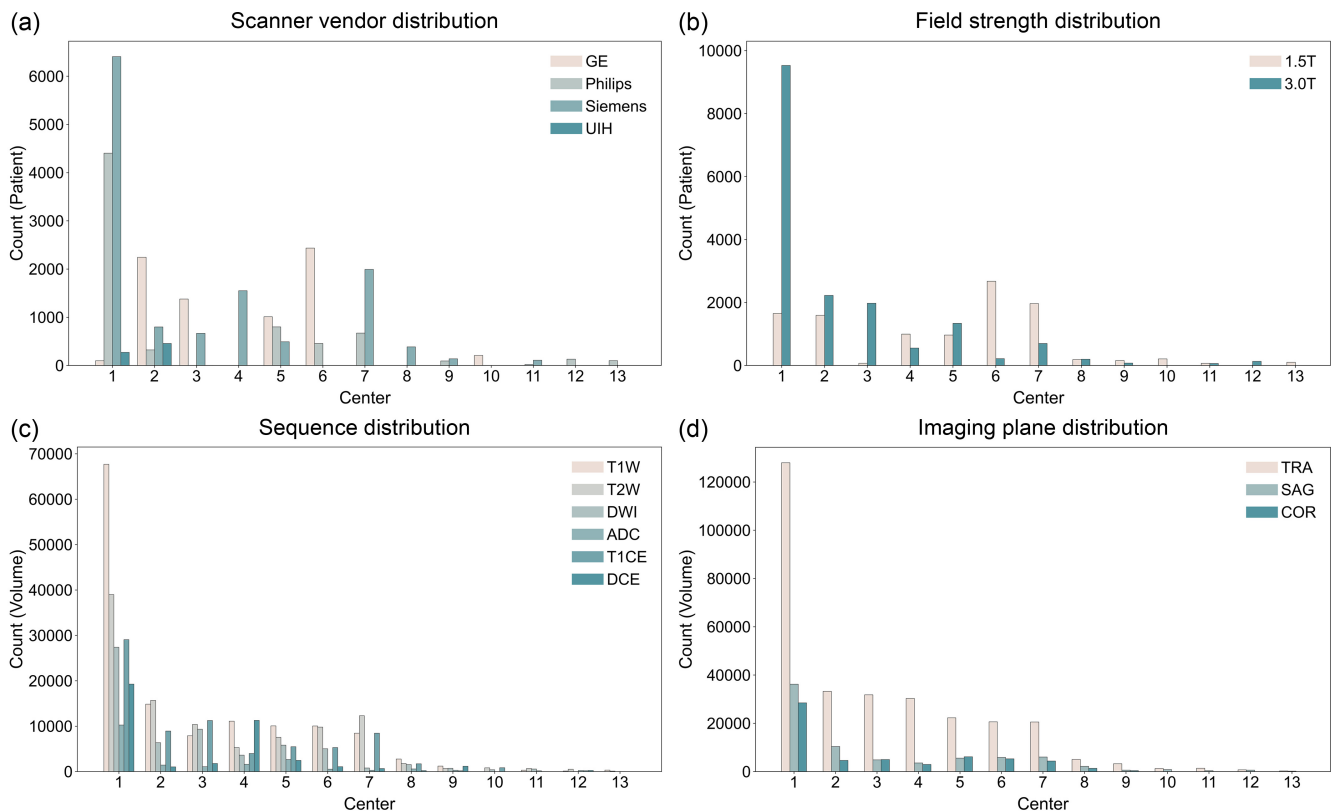

**Figure 1.** (a) MRI vendors, (b) field strength, (c) sequences, and (d) imaging planes distribution at different medical centers. T1-weighted (T1W), T2-weighted (T2W), T1 contrast-enhanced (T1CE), Diffusion Weighted Imaging (DWI), Apparent Diffusion Coefficient (ADC), and Dynamic Contrast Enhanced (DCE). Transverse(TRA), sagittal(SAG), and coronal(COR).

**Table 1.** Center information. Our database contains private datasets from 13 medical centers and 2 public datasets.

| Alias Name | Center Name                                                                                                                                 | Volume | Patient |
|------------|---------------------------------------------------------------------------------------------------------------------------------------------|--------|---------|
| Center 1   | Sun Yat-sen Memorial Hospital                                                                                                               | 192663 | 11422   |
| Center 2   | Sun Yat-sen University Cancer Center                                                                                                        | 48313  | 4197    |
| Center 3   | The First Affiliated Hospital of Guangzhou University of Chinese Medicine                                                                   | 41693  | 2048    |
| Center 4   | Shantou Central Hospital                                                                                                                    | 36883  | 1621    |
| Center 5   | Shenshan Medical Center                                                                                                                     | 34032  | 2306    |
| Center 6   | The First People’s Hospital of Foshan                                                                                                       | 31782  | 2892    |
| Center 7   | Dongguan People’s Hospital                                                                                                                  | 30977  | 2666    |
| Center 8   | The First People’s Hospital of Kashi                                                                                                        | 8585   | 386     |
| Center 9   | Yunnan Cancer Hospital                                                                                                                      | 4273   | 232     |
| Center 10  | Guangdong Provincial Maternal and Child Health Hospital                                                                                     | 2084   | 210     |
| Center 11  | Guangdong Provincial Hospital of Traditional Chinese Medicine                                                                               | 1766   | 132     |
| Center 12  | The Third Affiliated Hospital of Guangzhou Medical University                                                                               | 1338   | 132     |
| Center 13  | Affiliated Cancer Hospital and Institute of Guangzhou Medical University                                                                    | 461    | 101     |
| UT_EndoMRI | Public link at: <a href="https://zenodo.org/records/13749613">https://zenodo.org/records/13749613</a>                                       | 321    | 146     |
| UMD        | Public link at: <a href="https://figshare.com/articles/dataset/UMD_zip/23541312">https://figshare.com/articles/dataset/UMD_zip/23541312</a> | 300    | 300     |

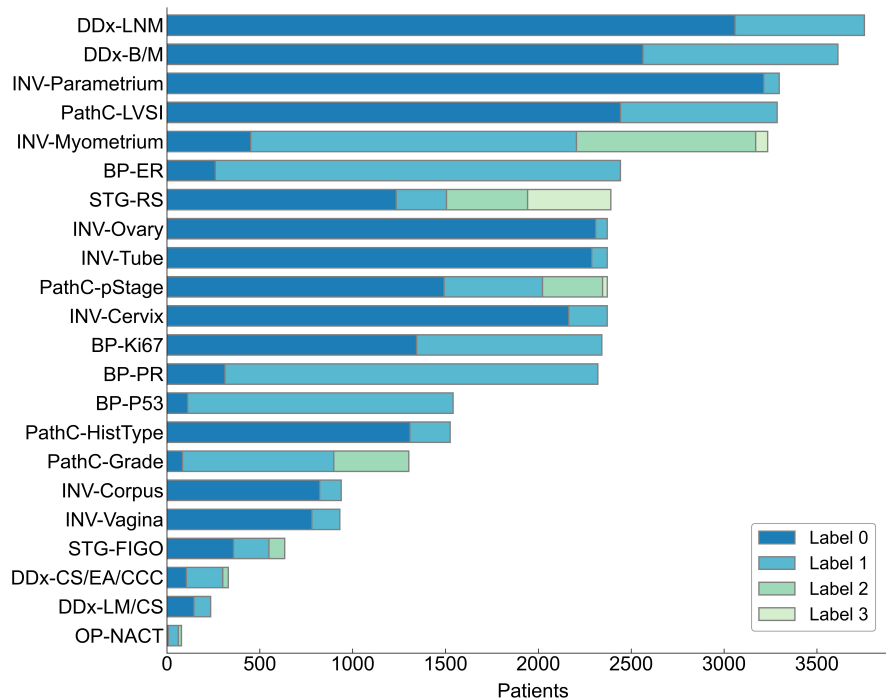

**Figure 2.** Label distribution in different centers. For binary classification tasks(BP-ER, BP-Ki67, BP-P53, BP-PR, DDx-BM, DDx-LNM, INV-Corpus, INV-Cervix, INV-Myometrium, INV-Ovary, INV-Parametrium, INV-Tube, INV-Vagina, and PathC-LVSI), label 0 represents no metastasis, negative, or benign, while label 1 represents metastasis, positive, or malignant. INV-Myometrium labels 0-3 represent none, less than 1/2, greater than 1/2, and full layer, respectively. PathC-Grade labels 0-2 represent high differentiation, moderate differentiation, and low differentiation, respectively. STG-RS labels 0-3 represent low risk, low-to-medium risk, medium-to-high risk, and high risk, respectively. STG-FIGO labels 0-2 represent FIGO I/II/III, respectively. PathC-HistType labels 0-1 represent squamous cell carcinoma and adenocarcinoma, respectively. PathC-pStage labels 0-3 represent periods I/II/III/IV, respectively. DDx-CS/EA/CCC labels 0-2 represent carcinosarcoma, adenocarcinoma, and clear cell cancer, respectively. DDx-LM/CS labels 0-1 represent uterine leiomyoma and carcinosarcoma, respectively. DDx-LM/CS labels 0-1 represent carcinosarcoma, adenocarcinoma, and clear cell cancer, respectively. DDx-LM/CS labels 0-1 represent uterine fibroids and carcinosarcoma, respectively. OP-NACT labels 0-2 represent complete response, partial response, and stable disease, respectively.

**Table 2.** This retrospective multi-center study obtained approval from the institutional review committees at all participating centers, and patient written informed consent was waived.

| Center Name                                                               | Ethics Approval Number                                  |
|---------------------------------------------------------------------------|---------------------------------------------------------|
| Sun Yat-sen Memorial Hospital                                             | SYSKY-2024-400-01, SYSKY-2024-801-01, SYSKY-2026-025-01 |
| Sun Yat-sen University Cancer Center                                      | SL-G2023-231-01, SL-B2023-348-02                        |
| The First Affiliated Hospital of Guangzhou University of Chinese Medicine | K-2025-209                                              |
| Shantou Central Hospital                                                  | 2025:026, 2024-113                                      |
| Shenshan Medical Center                                                   | 2025-SSKY-044-01, 2025-SSKY-045-01                      |
| The First People’s Hospital of Foshan                                     | 2025-262, 2025-261                                      |
| Dongguan People’s Hospital                                                | KYKT-2025-112, KYKT-2026-026                            |
| The First People’s Hospital of Kashi                                      | 2023:79                                                 |
| Yunnan Cancer Hospital                                                    | SLKYCS2024-263                                          |
| Guangdong Provincial Maternal and Child Health Hospital                   | 202401201                                               |
| Guangdong Provincial Hospital of Traditional Chinese Medicine             | BE2023-146                                              |
| The Third Affiliated Hospital of Guangzhou Medical University             | [2025] No.340                                           |
| Affiliated Cancer Hospital and Institute of Guangzhou Medical University  | 2021-SK02                                               |

46 **Structured Report Details**

47 The process of transforming unstructured gynecological imaging reports into structured data is achieved through information  
 48 extraction and standardized categorization (Table 7 and 8 ). It begins by analyzing free-text descriptions in the original reports  
 49 (e.g., "significant thickening of the upper endometrial lining with localized soft tissue mass formation") and then maps them to  
 50 four core modules based on a predefined medical ontology framework: lesion characteristics, extent of invasion, lymph node  
 51 status, and effusion assessment. Within the lesion module, the system identifies abnormality types (including no abnormality,  
 52 mass, cystic lesion, nodule, fat-containing lesion, and abnormal signal) across five anatomical regions: cervix, uterus, bilateral  
 53 adnexa, vagina, and pelvis. The invasion module evaluates involvement in ten key structures, such as the myometrium,  
 54 junctional zone, and serosal layer. The lymph node module classifies lymph node status across seven regions into three grades,  
 55 while the effusion module determines the presence of fluid in four anatomical areas. Through this refined structured conversion,  
 56 the original text is encoded into quantifiable metadata (e.g., pretrain metadata: "01000\_1010010000\_0000000\_0010\_1"), which  
 57 preserves critical clinical information while achieving data standardization. This provides high-quality structured input for  
 58 subsequent AI model training, clinical decision support, and precision medicine research.

**Table 3.** The amount of data in the training set, internal test set, and external test set for various tasks. In UT-EndoMRI, some segmentation targets have multiple annotations. The statistics we present here are based on the number of annotations, not the number of images.

| Task Categories               | Tasks               | Training |           | Internal test |           | External test |           |
|-------------------------------|---------------------|----------|-----------|---------------|-----------|---------------|-----------|
|                               |                     | Patients | Sequences | Patients      | Sequences | Patients      | Sequences |
| Differential Diagnosis        | DDx-B/M(OT)         | 2096     | 22942     | 524           | 5822      | 253           | 2749      |
|                               | DDx-B/M(PG)         | 592      | 18027     | 148           | 4366      |               |           |
|                               | DDx-CS/EA/CCC(EC)   | 264      | 1196      | 66            | 289       |               |           |
|                               | DDx-LM/CS(EC)       | 188      | 1360      | 47            | 298       |               |           |
|                               | DDx-LNM(CC)         | 586      | 3627      | 150           | 943       | 189           | 941       |
|                               | DDx-LNM(RC)         | 368      | 6507      | 92            | 1648      |               |           |
|                               | DDx-LNM(EC)         | 1716     | 13084     | 429           | 3210      | 226           | 1066      |
| Invasion Assessment           | INV-Corpus(CC)      | 600      | 3699      | 150           | 943       | 188           | 936       |
|                               | INV-Cervix(EC)      | 1716     | 13084     | 429           | 3210      | 226           | 1066      |
|                               | INV-Myometrium(CC)  | 543      | 3352      | 134           | 846       | 187           | 931       |
|                               | INV-Myometrium(EC)  | 1716     | 13084     | 429           | 3210      | 226           | 1066      |
|                               | INV-Ovary(EC)       | 1716     | 13084     | 429           | 3210      | 226           | 1066      |
|                               | INV-Parametrium(CC) | 588      | 3617      | 150           | 943       | 188           | 936       |
|                               | INV-Parametrium(EC) | 1716     | 13084     | 429           | 3210      | 226           | 1066      |
|                               | INV-Tube(EC)        | 1716     | 13084     | 429           | 3210      | 226           | 1066      |
|                               | INV-Vagina(CC)      | 596      | 3667      | 147           | 920       | 188           | 936       |
| Staging                       | STG-FIGO(CC)        | 404      | 2543      | 98            | 648       | 132           | 631       |
|                               | STG-RS(EC)          | 1716     | 13084     | 429           | 3210      | 245           | 1146      |
| Pathological Characterization | PathC-Grade(CC)     | 958      | 8823      | 226           | 2044      | 118           | 1025      |
|                               | PathC-HistType(CC)  | 1120     | 10562     | 280           | 2604      | 125           | 1095      |
|                               | PathC-LVSI(CC)      | 587      | 3613      | 144           | 906       | 184           | 916       |
|                               | PathC-LVSI(EC)      | 1716     | 13084     | 429           | 3210      | 226           | 1066      |
|                               | PathC-pStage(EC)    | 1716     | 13084     | 429           | 3210      | 226           | 1066      |
| Biomarker Prediction          | BP-ER(Pelvic)       | 1776     | 15736     | 457           | 3991      | 209           | 1188      |
|                               | BP-Ki67(Pelvic)     | 1520     | 13330     | 446           | 4055      | 376           | 2343      |
|                               | BP-P53(Pelvic)      | 1056     | 7656      | 277           | 1958      | 208           | 1136      |
|                               | BP-PR(Pelvic)       | 1692     | 14741     | 430           | 3711      | 198           | 1090      |
| Outcome Prediction            | OP-OS(CC)           | 509      | 3001      | 145           | 917       |               |           |
|                               | OP-OS(EC)           | 706      | 5089      | 218           | 4885      |               |           |
|                               | OP-NACT(CC)         | 47       | 857       | 31            | 605       |               |           |
| Report Generation             | MIL-Report(CC)      |          |           | 261           | 2991      |               |           |
|                               | MIL-Report(EC)      |          |           | 406           | 4638      |               |           |
|                               | MIL-Report(OT)      | 6672     | 98023     | 135           | 2051      |               |           |
|                               | MIL-Report(Pelvic)  |          |           | 866           | 15093     |               |           |
| Report Generation             | R2GenGPT(CC)        |          |           | 261           | 2991      |               |           |
|                               | R2GenGPT(EC)        |          |           | 406           | 4638      |               |           |
|                               | R2GenGPT(OT)        | 6672     | 98023     | 135           | 2051      |               |           |
|                               | R2GenGPT(Pelvic)    |          |           | 866           | 15093     |               |           |
| Segmentation                  | ClearTumor          | 16       | 88        | 3             | 18        |               |           |
|                               | EndoCancer          | 330      | 1040      | 197           | 260       |               |           |
|                               | UMD                 | 240      | 240       | 60            | 60        |               |           |
|                               | UT-EndoMRI          | 101      | 257       | 45            | 64        |               |           |

**Table 4.** Abbreviation table for various tasks

| Abbreviations       | Full names                                                                                                                                      |
|---------------------|-------------------------------------------------------------------------------------------------------------------------------------------------|
| DDx-B/M(OT)         | Classification of benign and malignant ovarian tumors.                                                                                          |
| DDx-B/M(PG)         | Classification of benign and malignant parotid gland tumors.                                                                                    |
| DDx-CS/EA/CCC(EC)   | Classification of carcinosarcoma, adenocarcinoma and clear cell carcinoma.                                                                      |
| DDx-LM/CS(EC)       | Classification of leiomyoma and carcinosarcoma.                                                                                                 |
| DDx-LNM(CC)         | Lymph node metastasis prediction in cervical cancer.                                                                                            |
| DDx-LNM(RC)         | Lymph node metastasis prediction in rectal cancer.                                                                                              |
| DDx-LNM(EC)         | Lymph node metastasis prediction in endometrial cancer.                                                                                         |
| INV-Corpus(CC)      | Assessment of uterine corpus invasion in endometrial cancer.                                                                                    |
| INV-Cervix(EC)      | Assessment of cervical invasion in endometrial cancer.                                                                                          |
| INV-Myometrium(CC)  | Assessment of myometrial invasion in cervical cancer.                                                                                           |
| INV-Myometrium(EC)  | Assessment of myometrial invasion in endometrial cancer.                                                                                        |
| INV-Ovary(EC)       | Assessment of ovarian invasion in endometrial cancer.                                                                                           |
| INV-Parametrium(CC) | Assessment of parametrial invasion in cervical cancer.                                                                                          |
| INV-Parametrium(EC) | Assessment of parametrial invasion in endometrial cancer.                                                                                       |
| INV-Tube(EC)        | Assessment of fallopian tube invasion in endometrial cancer.                                                                                    |
| INV-Vagina(CC)      | Assessment of vaginal invasion in cervical cancer.                                                                                              |
| STG-FIGO(CC)        | International Federation of Gynecology and Obstetrics(FIGO) staging of cervical cancer.                                                         |
| STG-RS(EC)          | Endometrial cancer risk stratification prediction.                                                                                              |
| PathC-Grade(CC)     | Cervical cancer differentiation grade prediction.                                                                                               |
| PathC-HistType(CC)  | Pathological types of cervical cancer.                                                                                                          |
| PathC-LVSI(CC)      | Lymphvascular space invasion prediction in cervical cancer.                                                                                     |
| PathC-LVSI(EC)      | Lymphvascular space invasion prediction in endometrial cancer.                                                                                  |
| PathC-pStage(EC)    | Pathological staging of endometrial cancer.                                                                                                     |
| BP-ER(Pelvic)       | Prediction of estrogen receptor (ER) in pelvic diseases.                                                                                        |
| BP-Ki67(Pelvic)     | Prediction of Kiel 67 (Ki67) in pelvic diseases.                                                                                                |
| BP-P53(Pelvic)      | Prediction of tumor protein p53 (P53) in pelvic diseases.                                                                                       |
| BP-PR(Pelvic)       | Prediction of progesterone receptor (PR) in pelvic diseases.                                                                                    |
| OP-OS(CC)           | Overall survival (OS) time of cervical cancer patients.                                                                                         |
| OP-OS(EC)           | Overall survival (OS) time of endometrial cancer patients.                                                                                      |
| OP-NACT(CC)         | Prediction of neoadjuvant chemotherapy efficacy in cervical cancer.                                                                             |
| MIL-Report(CC)      | Report generation via MIL-Report in a cervical cancer patient cohort.                                                                           |
| MIL-Report(EC)      | Report generation via MIL-Report in a endometrial cancer patient cohort.                                                                        |
| MIL-Report(OT)      | Report generation via MIL-Report in a ovarian tumor patient cohort.                                                                             |
| MIL-Report(Pelvic)  | Report generation via MIL-Report in a pelvic disease patient cohort.                                                                            |
| R2GenGPT(CC)        | Report generation via R2GenGPT in a cervical cancer patient cohort                                                                              |
| R2GenGPT(EC)        | Report generation via R2GenGPT in a endometrial cancer patient cohort.                                                                          |
| R2GenGPT(OT)        | Report generation via R2GenGPT in a ovarian tumor patient cohort.                                                                               |
| R2GenGPT(Pelvic)    | Report generation via R2GenGPT in a pelvic disease patient cohort.                                                                              |
| ClearTumor          | Clear cell carcinoma lesion segmentation.                                                                                                       |
| EndoCancer          | Endometrial cancer lesion segmentation.                                                                                                         |
| UMD                 | A publicly available uterine segmentation dataset containing four categories: muscular wall, uterine cavity, uterine myoma, and nabothian cyst. |
| UT-EndoMRI          | A publicly available pelvic segmentation dataset containing four categories: uterus, ovary, endometrioma, and cyst.                             |

**Table 5.** MRI acquisition. T1-weighted (T1W), T1 contrast-enhanced (T1CE); T2-weighted (T2W), Diffusion Weighted Imaging (DWI), Apparent Diffusion Coefficient (ADC), and Dynamic Contrast Enhanced (DCE).

| Institution |      | TR (ms)    | TE (ms)   | FOV (mm) | Slice Thickness (mm) | Flip Angle |
|-------------|------|------------|-----------|----------|----------------------|------------|
| Center 1    | T1W  | 3.09-4.15  | 1.17-1.9  | 320-480  | 3-5                  | 10-90      |
|             | T1CE | 2.81-600   | 0.5-12    | 320-480  | 3-6                  | 9-150      |
|             | T2W  | 1100-13000 | 75-130    | 230-480  | 3-6                  | 90-160     |
|             | DWI  | 2000-10000 | 50-115    | 230-430  | 3-6                  | 90-180     |
|             | ADC  | 2000-10000 | 50-115    | 230-430  | 3-6                  | 90-180     |
|             | DCE  | 3.6-10     | 1.15-3.38 | 250-320  | 3-5                  | 8-35       |
| Center 2    | T1W  | 3.09-500   | 1.17-12   | 220-480  | 2-7                  | 9-150      |
|             | T1CE | 3.07-600   | 0.5-12    | 250-460  | 2-7                  | 9-15       |
|             | T2W  | 1100-11300 | 75-135    | 200-430  | 3-7                  | 90-180     |
|             | DWI  | 1650-14500 | 49-115    | 240-420  | 3-6                  | 90-180     |
|             | ADC  | 1650-14500 | 49-115    | 240-420  | 3-6                  | 90-180     |
|             | DCE  | 3.09-6.25  | 1.17-2.3  | 260-480  | 3-5                  | 9-30       |
| Center 3    | T1W  | 500-750    | 8-20      | 240-480  | 3-6                  | 90-180     |
|             | T1CE | 3.9-5.1    | 1.2-2.5   | 250-480  | 3-5                  | 9-15       |
|             | T2W  | 2500-7500  | 70-110    | 240-400  | 3-6                  | 90-180     |
|             | DWI  | 4200-6500  | 45-70     | 220-400  | 3-5                  | 90         |
|             | ADC  | 4200-6500  | 45-70     | 220-400  | 3-5                  | 90         |
|             | DCE  | 3.16-7.86  | 1.15-2.36 | 250-420  | 3-5                  | 8-15       |
| Center 4    | T1W  | 3.92-6.81  | 1.39-2.39 | 300-490  | 3-5                  | 9-12       |
|             | T1CE | 2.96-756   | 1.2-8     | 200-500  | 3-7                  | 9-150      |
|             | T2W  | 3000-5600  | 72-105    | 240-510  | 3-7                  | 150-180    |
|             | DWI  | 1900-8500  | 50-93     | 280-380  | 4-7                  | 90-180     |
|             | ADC  | 1900-8500  | 50-93     | 280-380  | 4-7                  | 90-180     |
|             | DCE  | 3.23-5.42  | 1.18-2.39 | 250-480  | 3-7                  | 9-10       |
| Center 5    | T1W  | 100-800    | 2.25-15   | 250-400  | 3-7                  | 70-150     |
|             | T1CE | 3.6-5.1    | 1.2-3.1   | 280-450  | 3-6                  | 9-150      |
|             | T2W  | 1000-9000  | 60-130    | 240-480  | 3-7                  | 80-180     |
|             | DWI  | 3100-5600  | 60-90     | 160-380  | 3-6                  | 90-180     |
|             | ADC  | 3100-5600  | 60-90     | 160-380  | 3-6                  | 90-180     |
|             | DCE  | 3.6-10.0   | 1.1-2.0   | 250-400  | 3-5                  | 10-35      |
| Center 6    | T1W  | 3.09-500   | 1.17-12   | 260-480  | 3-7                  | 10-150     |
|             | T1CE | 2.28-400   | 0.5-13.2  | 240-480  | 3-6                  | 10-150     |
|             | T2W  | 1100-11300 | 75-135    | 280-510  | 3-6                  | 90-180     |
|             | DWI  | 820-7500   | 45-90     | 280-480  | 3-7                  | 90-180     |
|             | ADC  | 820-7500   | 45-90     | 280-480  | 3-7                  | 90-180     |
|             | DCE  | 3.52-4.26  | 1.67-2.1  | 320-450  | 4-6                  | 10-15      |

**Table 6.** MRI acquisitions. T1-weighted (T1W), T1 contrast-enhanced (T1CE); T2-weighted (T2W), Diffusion Weighted Imaging (DWI), Apparent Diffusion Coefficient (ADC), and Dynamic Contrast Enhanced (DCE)

| Institution |      | TR (ms)   | TE (ms)   | FOV (mm) | Slice Thickness (mm) | Flip Angle |
|-------------|------|-----------|-----------|----------|----------------------|------------|
| Center 7    | T1W  | 100-2300  | 2.25-11   | 250-400  | 3-7                  | 10-150     |
|             | T1CE | 3.7-4.9   | 1.2-2.4   | 280-450  | 3-6                  | 9-10       |
|             | T2W  | 1500-5500 | 70-120    | 280-450  | 3-6                  | 80-180     |
|             | DWI  | 5500-5600 | 60-65     | 350-450  | 3-7                  | 90-180     |
|             | ADC  | 5500-5600 | 60-65     | 350-450  | 3-7                  | 90-180     |
|             | DCE  | 3.66-4.83 | 1.23-2.35 | 280-450  | 3-6                  | 9-10       |
| Center 8    | T1W  | 250-750   | 2.22-11   | 250-400  | 5-6                  | 90-180     |
|             | T1CE | 3.97-1000 | 1.23-11   | 250-450  | 3-6                  | 10-180     |
|             | T2W  | 1200-4500 | 51-132    | 240-480  | 3-6                  | 90-180     |
|             | DWI  | 3000-8000 | 51-83     | 370-420  | 4-6                  | 90         |
|             | ADC  | 3000-8000 | 51-83     | 370-420  | 4-6                  | 90         |
|             | DCE  | 3.97-9    | 1.05-2.48 | 280-400  | 3-5                  | 4-12       |
| Center 9    | T1W  | 170-877   | 4.76-10   | 250-380  | 5-6                  | 70-150     |
|             | T1CE | 3.6-5.7   | 1.2-2.4   | 240-480  | 3-6                  | 10-30      |
|             | T2W  | 1500-4534 | 90-104    | 250-420  | 3-6                  | 90-170     |
|             | DWI  | 6400-7500 | 65-68     | 220-380  | 4-6                  | 90         |
|             | ADC  | 6400-7500 | 65-68     | 220-380  | 4-6                  | 90         |
|             | DCE  | 3.6-5.74  | 1.14-3.38 | 250-380  | 3-5                  | 10         |
| Center 10   | T1W  | 3.48      | 1.5       | 350-380  | 4                    | 15         |
|             | T1CE | 2.8-3.8   | 1.3-1.7   | 220-370  | 4-6                  | 15         |
|             | T2W  | 2941-3200 | 90-120    | 260-450  | 4-6                  | 90         |
|             | DWI  | 3840-5200 | 76-120    | 250-370  | 4-6                  | 90         |
|             | ADC  | 3840-5200 | 76-120    | 250-370  | 4-6                  | 90         |
| Center 11   | T1W  | 455-643   | 8.6-12.4  | 280-320  | 4-6                  | 90         |
|             | T1CE | 3.97-818  | 1.29-11   | 250-430  | 4-6                  | 90-140     |
|             | T2W  | 3789-5000 | 85-121    | 280-450  | 3-6                  | 140-150    |
|             | DWI  | 3539-6800 | 80-82     | 320-390  | 3-7                  | 90         |
|             | ADC  | 3539-6800 | 80-82     | 320-390  | 3-7                  | 90         |
|             | DCE  | 3.97      | 1.29      | 320-360  | 3                    | 9          |
| Center 12   | T1W  | 490-590   | 8-10      | 290-410  | 5-5                  | 90         |
|             | T1CE | 2.8-4.88  | 1-2.39    | 320-420  | 3-6                  | 10         |
|             | T2W  | 1250-3000 | 70-120    | 280-400  | 3-5                  | 90         |
|             | DWI  | 1600-6420 | 50-60     | 250-420  | 5-6                  | 90         |
|             | ADC  | 1600-6420 | 50-60     | 250-420  | 5-6                  | 90         |
| Center 13   | T1W  | 492-587   | 10-10     | 290-410  | 5-5                  | 90         |
|             | T1CE | 2.7-4.9   | 1.2-3.5   | 280-420  | 3-6                  | 10         |
|             | T2W  | 1500-3500 | 60-130    | 320-380  | 3-6                  | 90         |
|             | DWI  | 1250-2026 | 55-70     | 380-420  | 3-6                  | 90         |
|             | ADC  | 1250-2026 | 55-70     | 380-420  | 3-6                  | 90         |

**Table 7.** Structured report details. This table demonstrates, through a real-world report example, how to convert a raw report into a structured report, and then into metadata. The metadata will be used for subsequent pre-training and training for downstream tasks.

| Structured Dimension    | Unstructured Report                                                                                                                                                                                         | Structured Items                                                                                                                                                                   | Structured Report                                                                                                                                                       | Metadata                                                           |
|-------------------------|-------------------------------------------------------------------------------------------------------------------------------------------------------------------------------------------------------------|------------------------------------------------------------------------------------------------------------------------------------------------------------------------------------|-------------------------------------------------------------------------------------------------------------------------------------------------------------------------|--------------------------------------------------------------------|
| Part 1: Lesion Status   | “The endometrium in the upper uterine segment is markedly thickened, forming a localized soft tissue mass measuring approximately 44mm × 31mm × 39mm.”                                                      | <b>Location:</b> Cervix; Uterus; Bilateral Adnexa; Pelvic; Vagina. <b>Abnormality (0–5):</b> Normality; Mass; Cystic Lesion; Abnormal Signal; Nodule; Fat.                         | No significant abnormalities were observed in the cervix. A mass is seen in the uterus. No significant abnormalities were observed in the bilateral adnexa or vagina.   | <b>Report generation:</b> 01000. <b>Pretrain:</b> 01000.           |
| Part 2: Invasion Status | “Invasion extends to the myometrium at the uterine fundus reaching the serosal surface.” “The mass extends distally to the internal cervical os”                                                            | <b>Location:</b> Myometrium; Junctional; Serosal layer; Vagina; Uterine body; Cervix; Parametrium; Pelvic wall; Bladder; Rectum. <b>Abnormality (0–1):</b> Normality; Abnormality. | Invasion involves the myometrium and serosal layer. No invasion is seen in the vagina, uterine body, pelvic sidewall, bladder, or rectum. Invasion involves the cervix. | <b>Report generation:</b> 1010000000. <b>Pretrain:</b> 1010000000. |
| Part 3: Lymph Nodes     | “No enlarged lymph nodes are seen along the bilateral iliac vessels or in the bilateral inguinal regions”                                                                                                   | <b>Location:</b> Pelvic; Along iliac vessels; Para-aortic; Inguinal; Obturator; Presacral; Peritoneal. <b>Abnormality (0–2):</b> Normal; Enlarged lymph node; Small lymph node.    | No significant abnormalities are seen in pelvic, iliac vessel, para-aortic, or inguinal lymph nodes.                                                                    | <b>Report generation:</b> 0000000. <b>Pretrain:</b> 0000000.       |
| Part 4: Effusion Status | “Moderate amount of pelvic effusion.”                                                                                                                                                                       | <b>Location:</b> Uterine cavity; Fallopian tubes; Pelvic cavity; Peritoneum. <b>Abnormality (0–1):</b> No effusion, effusion.                                                      | No effusion is seen in the uterine cavity or fallopian tubes. Pelvic effusion is present.                                                                               | <b>Report generation:</b> 0010. <b>Pretrain:</b> 0010.             |
| Imaging Conclusion      | “Localized thickening of the upper endometrial lining forming a soft-tissue mass, consistent with endometrial carcinoma, involving the deep myometrium and the internal cervical os, with pelvic effusion.” | <b>Abnormality (0–1):</b> No significant abnormality, abnormality.                                                                                                                 | A mass is seen in the uterus, consistent with endometrial carcinoma, involving the myometrium, serosal layer, and cervix, with pelvic effusion.                         | <b>Report generation:</b> N/A. <b>Pretrain:</b> 1.                 |

**Table 8.** Examples of unstructured and structured image reports.

| Unstructured Image Reports                                                                                                                                                                                                                                                                                                                                                                                                                                                                                                                                                                                                                                                                                                                                                                                                                                                                                                                                                                                                                                                                                                                                                                                                                                                                                                               | Structured Image Reports                                                                                                                                                                                                                                                                                                                                                                                                                                                                                                                                                                                                                                                                                                                                                                                                                                                                                            |
|------------------------------------------------------------------------------------------------------------------------------------------------------------------------------------------------------------------------------------------------------------------------------------------------------------------------------------------------------------------------------------------------------------------------------------------------------------------------------------------------------------------------------------------------------------------------------------------------------------------------------------------------------------------------------------------------------------------------------------------------------------------------------------------------------------------------------------------------------------------------------------------------------------------------------------------------------------------------------------------------------------------------------------------------------------------------------------------------------------------------------------------------------------------------------------------------------------------------------------------------------------------------------------------------------------------------------------------|---------------------------------------------------------------------------------------------------------------------------------------------------------------------------------------------------------------------------------------------------------------------------------------------------------------------------------------------------------------------------------------------------------------------------------------------------------------------------------------------------------------------------------------------------------------------------------------------------------------------------------------------------------------------------------------------------------------------------------------------------------------------------------------------------------------------------------------------------------------------------------------------------------------------|
| <p><b>Imaging Findings:</b> The uterine volume is slightly enlarged. The endometrium is significantly thickened, with a maximum thickness of approximately 16 mm. It appears isointense on T1-weighted images (T1WI), slightly hyperintense on T2-weighted images (T2WI), and hyperintense on diffusion-weighted imaging (DWI). Mild enhancement is observed on post-contrast scans, with an ill-defined border from the junctional zone. Several cystic lesions exhibiting long T1 and long T2 signals are also noted in the cervix, the largest measuring about 13 mm in length, showing no enhancement. No significant abnormalities are detected in the bilateral adnexa. A small amount of pelvic fluid is present. The urinary bladder is well-distended with clear margins. The rectum appears unremarkable. No significantly enlarged lymph nodes are seen in the bilateral iliac vessel regions or bilateral inguinal areas. The visualized bones show no signs of destruction. <b>Report Conclusion:</b> Endometrial thickening, consistent with endometrial carcinoma, suspicious for involvement of the junctional zone. Several cystic foci in the cervix are most likely cysts. A small amount of pelvic fluid is present.</p>                                                                                             | <p><b>Imaging Findings:</b> A cystic lesion is noted in the cervix. A mass is identified within the uterus. No significant abnormalities are detected in the bilateral adnexa. There is involvement of the junctional zone. No invasion is seen into the serosal layer, vagina, uterine body, pelvic sidewall, urinary bladder, or rectum. There is no significant abnormality in the pelvic lymph nodes, lymph nodes adjacent to the iliac vessels, para-aortic lymph nodes, or inguinal lymph nodes. No fluid is seen in the uterine cavity or fallopian tubes. Pelvic fluid is present. <b>Imaging conclusion:</b> A uterine mass, consistent with endometrial carcinoma. A cystic lesion is noted in the cervix. There is involvement of the junctional zone. Pelvic fluid is noted. <b>Report metadata:</b> 210000000000000000000000000010. <b>Pretraining metadata:</b> 11000000000000000000000000000101.</p> |
| <p><b>Imaging Findings:</b> The endometrium in the upper uterine segment is markedly thickened, forming a localized soft tissue mass measuring approximately 44mm × 31mm × 39mm. The mass extends distally to the internal os of the cervical canal. It demonstrates an irregular contour and heterogeneous signal intensity: isointense on T1-weighted images, mildly hyperintense on T2-weighted images, with restricted diffusion and heterogeneous enhancement post-contrast. The adjacent junctional zone is obliterated. The mass involves the myometrium from the fundus to the serosal surface. There is right adnexal involvement. No significant abnormality is seen in the left adnexa. The cervix is normal in size and morphology. No obvious lesion is identified in the bilateral parametria. The rectal wall is not thickened. The bladder is poorly distended but with clear margins. No enlarged lymph nodes are seen in the bilateral iliac vessels region or bilateral inguinal areas. The visualized bones show no significant abnormality. <b>Report Conclusion:</b> Localized endometrial thickening forming a soft tissue mass in the upper uterine segment, compatible with endometrial carcinoma, involving the deep myometrium and the internal os of the cervical canal, with right adnexal involvement.</p> | <p><b>Imaging Findings:</b>The cervix showed no obvious abnormalities. A mass was seen in the uterus. The bilateral adnexa showed no obvious abnormalities. The myometrium and serosa layer were involved; the vagina, uterine body, cervix, pelvic wall, bladder, and rectum were not invaded. No obvious abnormalities were seen in the pelvic, paraaortic, or inguinal lymph nodes. No fluid was seen in the uterine cavity, fallopian tubes, or pelvic cavity. <b>Imaging conclusion:</b> A uterine mass is identified, compatible with endometrial carcinoma, involving the myometrium, serosal layer, and cervix. <b>Report metadata:</b> 010001010010000000000000000000. <b>Pretraining metadata:</b> 010001010010000000000000000001.</p>                                                                                                                                                                    |

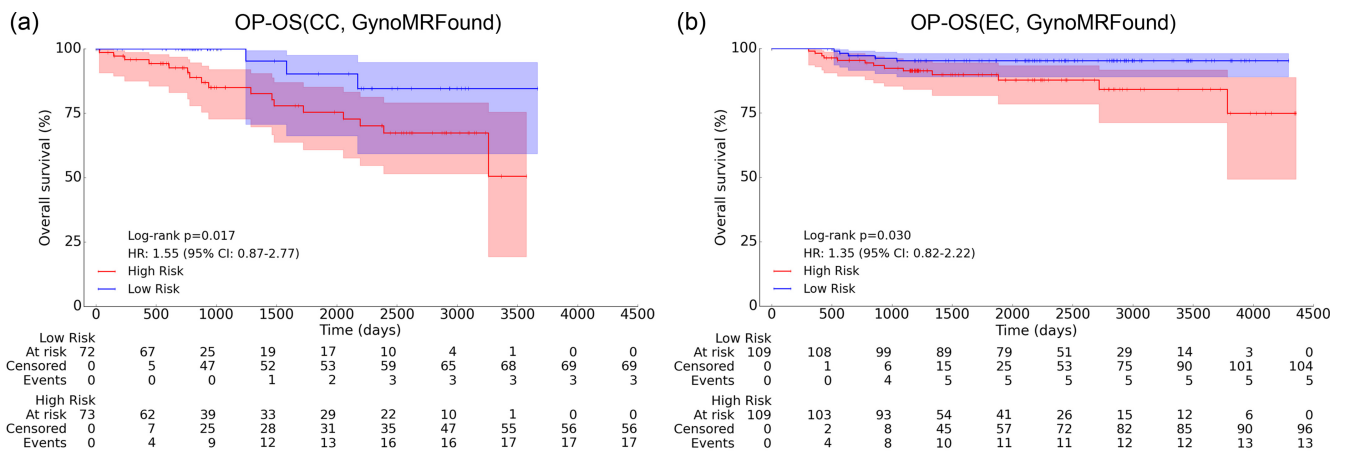

**Figure 3.** Survival prediction efficacy assessment for patients with cervical cancer and endometrial cancer. (a) Cervical cancer patient cohort. (b) Endometrial cancer patient cohort. The red and blue curves represent the high-risk and low-risk groups, respectively. The table below lists the number of at-risk individuals, the number of events, and the number of censored events at each time point.

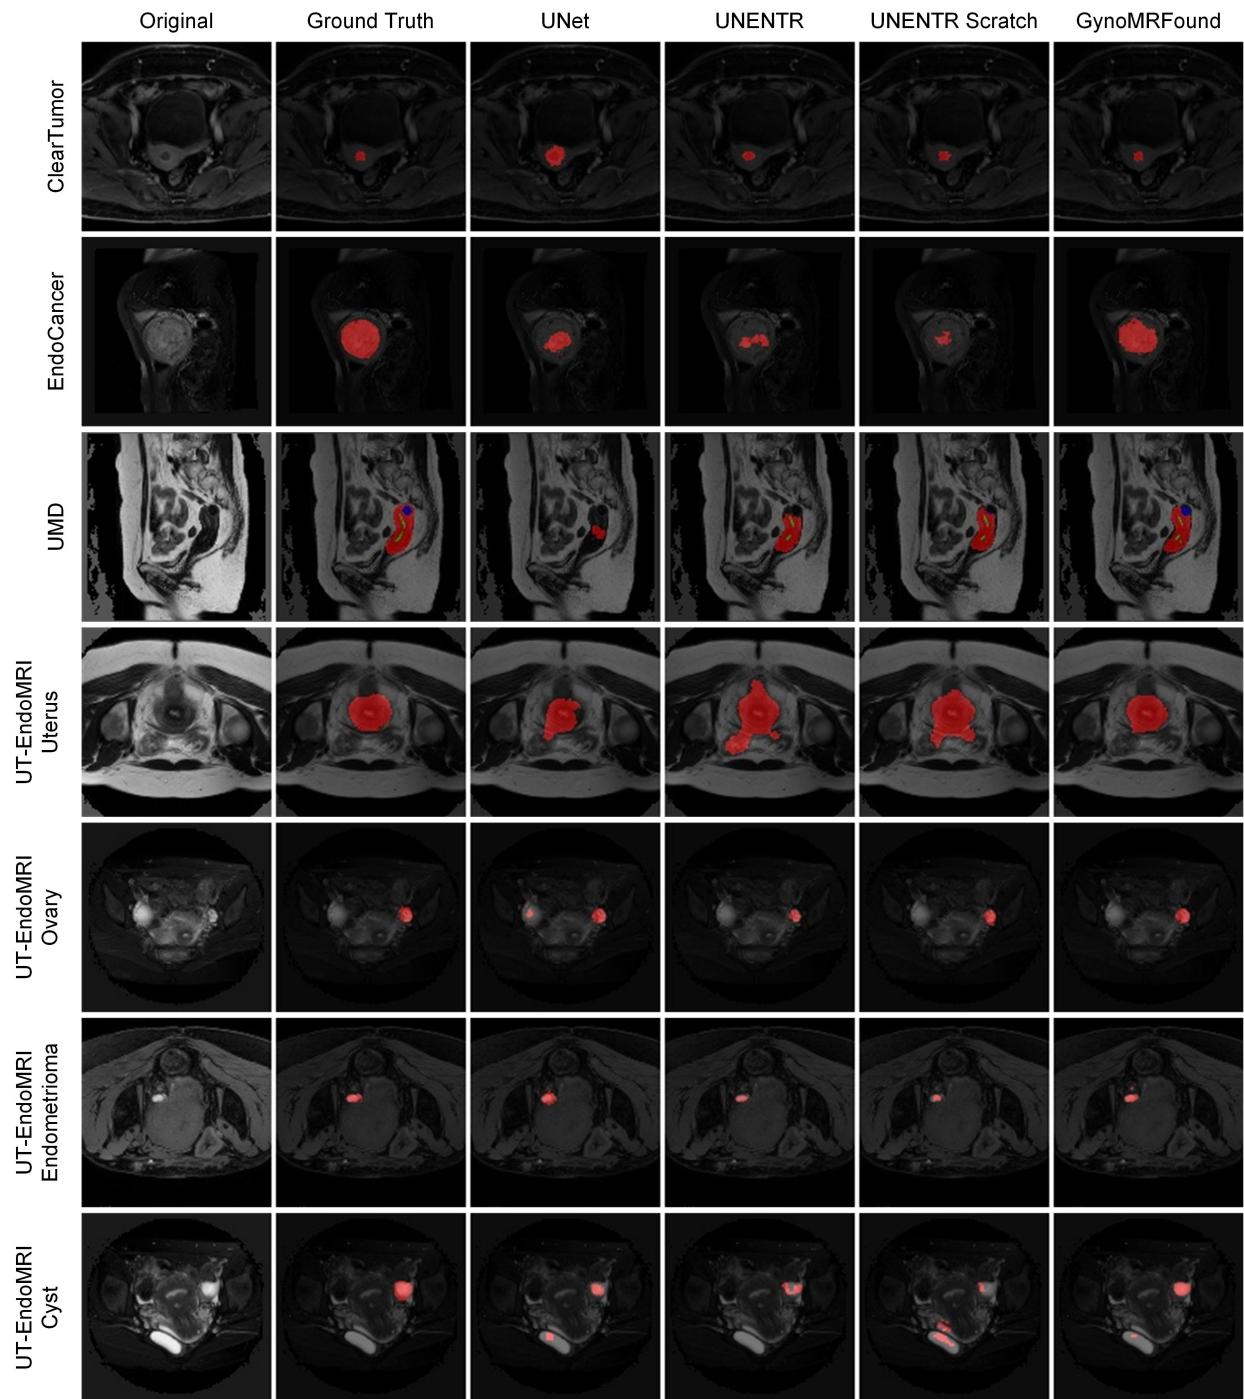

**Figure 4.** Visual comparison in segmentation tasks.
